1 **Eavesdropping and crosstalk between secreted quorum sensing peptide signals that regulate bacteriocin**  
2 **production in *Streptococcus pneumoniae***

3

4 Eric L. Miller<sup>a,b,§</sup>, Morten Kjos<sup>c,d,§</sup>, Monica I. Abrudan<sup>e,g</sup>, Ian S. Roberts<sup>a,1</sup>, Jan-Willem Veening<sup>c,f,1</sup> and Daniel E.  
5 Rozen<sup>b,1</sup>

6

7 <sup>a</sup> School of Biological Science, Faculty of Biology, Medicine, and Health, Manchester Academic Health  
8 Science Centre, University of Manchester, Manchester, M13 9PL, UK.

9 <sup>b</sup> Institute of Biology Leiden, Leiden University, Leiden, 2333 BE, The Netherlands.

10 <sup>c</sup> Molecular Genetics Group, Groningen Biomolecular Sciences and Biotechnology Institute, Centre for Synthetic  
11 Biology, University of Groningen, Groningen, 9700 AE, The Netherlands.

12 <sup>d</sup> Faculty of Chemistry, Biotechnology and Food Science, Norwegian University of Life Sciences, N-1432 Ås, Norway

13 <sup>e</sup> Wellcome Trust Sanger Institute, Genome Campus, Cambridge, CB10 1SA, UK

14 <sup>f</sup> Department of Fundamental Microbiology, Faculty of Biology and Medicine, University of Lausanne, Biophore  
15 Building, CH-1015 Lausanne, Switzerland

16 <sup>g</sup> Faculty of Medicine, School of Public Health, Imperial College, London W2 1PG, United Kingdom

17

18

19

20 <sup>§</sup> These authors contributed equally to this work.

21

22 <sup>1</sup> Correspondence to: [d.e.rozen@biology.leidenuniv.nl](mailto:d.e.rozen@biology.leidenuniv.nl)

23 [Jan-Willem.Veening@unil.ch](mailto:Jan-Willem.Veening@unil.ch)

24 [i.s.roberts@manchester.ac.uk](mailto:i.s.roberts@manchester.ac.uk)

25

26 Subject Category: Evolutionary genetics

27 Running title: Intraspecific crosstalk in *blp* quorum sensing

28 Key words: Streptococcus, quorum sensing, intra-species competition, signaling, eavesdropping, crosstalk

29

30 **Abstract**

31 Quorum sensing (QS), where bacteria secrete and respond to chemical signals to coordinate population-wide behaviors,  
32 has revealed that bacteria are highly social. Here, we investigate how diversity in QS signals and receptors can modify  
33 social interactions controlled by the QS system regulating bacteriocin secretion in *Streptococcus pneumoniae*, encoded  
34 by the *blp* operon (bacteriocin-like peptide). Analysis of 4 096 pneumococcal genomes detected nine *blp* QS signals  
35 (BlpC) and five QS receptor groups (BlpH). Imperfect concordance between signals and receptors suggested  
36 widespread social interactions between cells, specifically eavesdropping (where cells respond to signals that they do not  
37 produce) and crosstalk (where cells produce signals that non-clones detect). This was confirmed *in vitro* by measuring  
38 the response of reporter strains containing each of six different *blp* QS receptors to cognate and non-cognate peptides.  
39 Assays between pneumococcal colonies grown adjacent to one another provided further evidence that crosstalk and  
40 eavesdropping occur at endogenous levels of signal secretion. Finally, simulations of QS strains producing bacteriocins  
41 revealed that eavesdropping can be evolutionarily beneficial even when the affinity for non-cognate signals is very  
42 weak. Our results highlight that social interactions can mediate intraspecific competition among bacteria and reveal that  
43 competitive interactions can be modified by polymorphic QS systems.

44

## 45 **Introduction**

46 Quorum sensing (QS) is a mechanism of intercellular communication that allows bacterial populations to  
47 coordinately regulate gene expression in response to changes in population density. QS is controlled by the secretion  
48 and detection of diffusible signaling molecules that, at threshold concentrations, lead to increased signal secretion and  
49 the induction of coupled downstream pathways (Miller & Bassler 2001; Waters & Bassler 2005). By this process, QS  
50 ensures that metabolically costly products are only produced when this would benefit the bacterial population, i.e. when  
51 they are at high concentrations (Waters & Bassler 2005). QS systems are coordinated by the fact that cells  
52 simultaneously send and detect a specific signal (Bassler et al. 1997; Redfield 2002; Waters & Bassler 2005), a  
53 characteristic that increases the likelihood that QS functions as a private message between clonemates that share  
54 evolutionary interests (Crespi 2001; West et al. 2006; Schluter et al. 2016). However, although QS works as an effective  
55 means of gene regulation in the laboratory in single strain cultures, QS in nature may be less reliable because it is  
56 susceptible to signal eavesdropping (i.e. where a promiscuous QS receptor can detect a QS signal not produced by that  
57 genotype) and signal crosstalk (i.e. where a non-specific QS signal can activate QS receptors in genotypes that produce  
58 other QS signals) (Redfield 2002; Atkinson & Williams 2009). This variation in QS signals and QS signal detection is  
59 widespread in nature (Bouillaut et al. 2008; Swem et al. 2008; Ansaldi & Dubnau 2004; Ji et al. 1997) and distinct from  
60 well-studied cheater/cooperator dynamics (e.g. Jiricny et al. 2010; Strassmann & Queller 2011). For example, signal-  
61 blind bacteria that produce, but are incapable of responding to, QS signals can engage in signal crosstalk to manipulate  
62 the behavior of other cells, e.g. by inducing them to produce expensive public goods (Diggle et al. 2007). Crosstalk and  
63 eavesdropping can occur even if all cells within a population are otherwise phenotypically wild-type if (i) QS signals  
64 and receptors are polymorphic and (ii) signals can bind and activate more than one receptor variant. Here we examine  
65 these issues using the polymorphic QS system regulating bacteriocin production in the Gram-positive opportunistic  
66 pathogen *Streptococcus pneumoniae*, where QS is integral for mediating intraspecific competition.

67 To initiate infection, *S. pneumoniae* must successfully colonize the nasopharynx and then persist during  
68 subsequent colonization attempts from other strains. Commensal carriage of *S. pneumoniae* is widespread, affecting up  
69 to 88% of children worldwide (Regev-Yochay et al. 2004; Wyllie et al. 2014), and between 5-52% of individuals are  
70 co-colonized with multiple strains (Wyllie et al. 2014; Sauver et al. 2000; García-Rodríguez & Fresnadillo Martínez  
71 2002; Brugger et al. 2010). Interactions between different strains during colonization are common and dynamic, and the  
72 rate of clonal turnover — where one strain displaces another — occurs on a timescale of days to months (Meats et al.  
73 2003; Turner et al. 2012). Among the factors thought to mediate intraspecific competition among pneumococcal strains  
74 are small anti-microbial peptides with narrow target ranges called bacteriocins (Dawid et al. 2007), which are regulated  
75 by QS. The most diverse bacteriocins in *S. pneumoniae* are encoded by the *blp* (bacteriocin-like peptides) locus (Lux et  
76 al. 2007; Dawid et al. 2007). We recently showed that the number of possible combinations of bacteriocins and

77 immunity genes at this locus can extend into the trillions, although only several hundred combinations are actually  
78 observed (Miller et al. 2016). As with other Gram-positive peptide signals, the QS signal peptide (BlpC) regulating the  
79 *blp* operon is constitutively produced at low levels, but is auto-induced at high levels once a threshold concentration has  
80 been reached (Lux et al. 2007). Secreted BlpC binds to the extracellular domain of the membrane-bound histidine  
81 kinase BlpH, and upon binding the kinase phosphorylates the response regulator BlpR (Fig 1b; De Saizieu et al. 2000;  
82 Reichmann & Hakenbeck 2000) which initiates production of the *blp* bacteriocin and immunity genes and increases  
83 production of the BlpC signal (De Saizieu et al. 2000). *blpC* expression is also enhanced by the induction of  
84 pneumococcal competence, which is regulated by the paralogous *com* QS signaling system (Kjos et al. 2016). Both  
85 ABC transporters BlpAB (Håvarstein et al. 1995) and ComAB (Kjos et al. 2016; Wei-Yun et al. 2016) cleave the N-  
86 terminal, double-glycine leader sequence of BlpC before export of the mature peptide signal by the same transporters  
87 (Fig. 1b). Using QS to regulate secretion presumably ensures that Blp bacteriocins are only produced when there is a  
88 sufficiently high cell number to allow these anti-competitor toxins to reach effective concentrations.

89 Both the BlpC signal and its receptor, BlpH, are highly polymorphic (Miller et al. 2016). What are the effects of  
90 this variation, and how does this diversity influence the competitive interactions between strains that are mediated by  
91 *blp* bacteriocins? One possibility is that each unique BlpC signal corresponds to a distinct BlpH receptor to which it  
92 specifically and exclusively binds. By this explanation, strains detect and respond only to their own signal to determine  
93 the threshold at which they induce the *blp* operon. Such exclusivity is found in the *S. pneumoniae* competence signaling  
94 system where the two dominant peptide signals, CSP1 and CSP2, only induce cells expressing the cognate receptor  
95 (Iannelli et al. 2005). Similarly, there is near perfect concordance between the signal and receptor carried by any single  
96 genome, suggesting that tight coupling of these loci is crucial for the activation of competence (Miller et al. 2017). An  
97 alternative possibility, considered in a recent experimental study (Pinchas et al. 2015), is that BlpC peptides cross-react  
98 via crosstalk or eavesdropping with different BlpH receptors, thereby leading to a scenario where competing strains  
99 interact socially to induce the production of either immunity or bacteriocins at densities that would be insufficient for  
100 activation by auto-induction. Bacterial strains may benefit from this cross-reactivity if they are forewarned of the threats  
101 from others, allowing them to induce their own bacteriocins or immunity. Alternatively, eavesdropping may be costly if  
102 strains with promiscuous receptors are induced to secrete bacteriocins at densities that are too low to provide sufficient  
103 benefits to offset the costs of their production. *S. pneumoniae* presents an ideal opportunity to study the evolution of QS  
104 systems beyond cheater/cooperator dynamics (Pollak et al. 2016; Eldar 2011; Son et al. 2011) in an easily manipulated,  
105 highly relevant study system in which much is already known about signal/receptor dynamics (Pinchas et al. 2015). Our  
106 results reveal the importance of QS signaling polymorphism on *blp* operon regulation and clarify its ecological effects  
107 on *S. pneumoniae* intraspecific interactions.

108

## 109 **Materials and Methods**

### 110 **Phylogenetic and Sequence Analysis**

111 We analyzed *S. pneumoniae* genomes from eight publicly available sets, six of which contain strains that were  
112 randomly sampled from cases of disease or asymptomatic carriage: 3 017 genomes from refugees in Maela, Thailand  
113 (Chewapreecha et al. 2014); 616 genomes from Massachusetts carriage strains (Croucher, Finkelstein, et al. 2013); 295  
114 genomes from GenBank, which include 121 genomes from Atlanta, Georgia, The United States (Chancey et al. 2015);  
115 142 genomes from Rotterdam, the Netherlands (Hermans data set) (Bogaert et al. 2001; Miller et al. 2016); and 26  
116 PMEN (Pneumococcal Molecular Epidemiology Network) genomes (McGee et al. 2001; Miller et al. 2016). The  
117 PMEN-1 (Croucher et al. 2011) and Clonal Complex 3 (Croucher, Mitchell, et al. 2013) data sets, containing 240 and  
118 82 genomes, respectively, were a result of targeted sampling for specific clonal complexes of *S. pneumoniae*; as such,  
119 these strains were excluded from analyses that assumed random sampling. Details of the phylogenetic and sequence  
120 analysis are provided in the Supplemental Materials

121

### 122 **Bacterial strains and growth conditions**

123 *S. pneumoniae* strains were grown as liquid cultures in C+Y medium (Moreno-Gamez et al. 2016) at 37°C and  
124 transformed as described previously (Kjos et al. 2016). For selection, *S. pneumoniae* was plated on Columbia agar  
125 supplemented with 2% defibrinated sheep blood (Johnny Rottier, Kloosterzande, Netherlands) and 1 µg/ml tetracycline,  
126 100 µg/ml spectinomycin or 0.25 µg/ml erythromycin, when appropriate. *E. coli* was grown in LB medium with  
127 shaking at 37°C or plated on LA containing 100 µg/ml ampicillin.

128

### 129 **Strain construction**

130 Strains and plasmids used in this study are listed in Table S3. Full descriptions of strain construction for the  
131 expression of *blpSRH* alleles, the deletion of *blpSRHC*, and gene reporter constructs are given in the Supplemental  
132 Materials and Methods.

133

### 134 **Luciferase assays**

135 Luciferase assays were performed as described (Slager et al. 2014; Kjos et al. 2016). Briefly, *S. pneumoniae*  
136 cultures grown to OD<sub>600</sub> 0.4 were diluted 100-fold in C+Y medium (pH 6.8) with 340 µg/ml luciferin. Luc-activity was  
137 measured in 96-well plates at 37°C, and OD<sub>600</sub> and luminescence (as relative luminescence units, RLU) were recorded  
138 every 10 minutes using Tecan Infinite 200 PRO. Synthetic peptides (BlpCs) were purchased from Genscript  
139 (Piscataway, NJ). Different concentrations of BlpCs were added to the culture wells after 100 min or in the beginning of  
140 the experiment, depending on the experiment. The data was plotted as RLU/OD over time to analyze induction of *blp*

141 expression.

142

### 143 **LacZ assays on agar plates**

144 LacZ assays for testing induction by neighbouring colonies on plates were performed on C+Y agar (pH 8.0)  
145 covered with 40  $\mu$ l of 40 mg/ml solution X-gal (spread on top of the plates). All strains were pre-grown to OD<sub>600</sub> 0.4,  
146 before 2  $\mu$ l of the wild-type strains (BlpC producers) were spotted and allowed to dry. Then 2  $\mu$ l of the different  
147 reporter strains were spotted next to the dried spot. The plates were incubated at 37°C over-night.

148 For induction with synthetic BlpC, C+Y agar plates (pH 7.2) were covered with 40  $\mu$ l of 40 mg/ml solution X-  
149 gal and 5  $\mu$ l 1 mg/ml BlpC (spread on top of the plates), and different reporter strains were spotted on top. The plates  
150 were incubated at 37°C over-night.

151

### 152 **Stochastic Model**

153 We built an individual-based spatial, stochastic model in which cells interact on a grid. We modeled four  
154 genotypes, which differ in the signaling molecule and bacteriocins that they produce as well as in the number and  
155 identity of signals that they respond to (Table S2). Bacteriocins produced by genotypes 1 and 2 specifically could kill  
156 genotypes 3 and 4 and vice versa. Signals produced by genotype 1 could induce genotypes 1 and 2 and similarly,  
157 signals produced by genotype 3 could induce genotypes 3 and 4; we therefore classify genotypes 2 and 4 as  
158 “eavesdropping genotypes”. Genotypes 1 and 3 can only respond to their own signal, as “signal-faithful genotypes”. All  
159 four genotypes have equivalent growth rates, which are only variable depending on if a cell is induced or uninduced.  
160 Eavesdropping cells respond to signals that they do not produce with certain degrees of affinity. If we consider the  
161 affinity of a cell to its own signal as 100%, we ranged the affinity to the other signals in the case of eavesdropping  
162 genotypes as 0% - 90% for different simulations. Full model details are given in the Supplemental Materials and  
163 Methods.

164

## 165 **Results**

### 166 **Molecular diversity of *blpH* and *blpC***

167 We examined 4 096 *S. pneumoniae* genomes taken from six data sets of strains (Macla, Massachusetts  
168 Asymptomatic, GenBank, Hermans, Georgia GenBank, and PMEN: 4 096 genomes in total) alongside two additional  
169 data sets that are intentionally biased to specific clonal sub-groups (Complex 3 and PMEN-1: 322 genomes in total).  
170 We identified *blpC* in 99.0%, *blpH* in 99.0%, and both *blpC* and *blpH* in 98.2% of the combined 4 418 genomes using a  
171 DNA reciprocal BLAST algorithm (Miller et al. 2016). We note that the few genomes apparently lacking a *blp* gene  
172 may still contain these genes, as the data sets contain incomplete draft genomes. Consistent with earlier work (Miller et

173 al. 2016), we found extensive allelic variation within *blpC*, which contains 37 alleles at the nucleotide level, 29 protein  
174 variants, and 20 different BlpC signal peptides, including signal peptides lacking a canonical double-glycine cleavage  
175 site. Nine of these peptide signal sequences were found in more than 0.5% of genomes (i.e., over 20 genomes; Table 1),  
176 and together these nine comprise ~98% of all signal variants. All signals under this 0.5% threshold were each confined  
177 to a single clade in the whole-genome phylogeny (Fig. S1). Each unique BlpC signal was designated with a letter from  
178 the NATO phonetic alphabet (Table 1). As expected for the genomes from intentionally biased samples, the PMEN-1  
179 dataset almost exclusively carried the Golf signal (93.8%; Table S1), while the Clonal Complex 3 dataset almost  
180 exclusively carried the Kilo signal (97.6%; Table 1). The Bravo and Hotel signal peptides were exclusively found in  
181 strains collected as part of the Maela data set possibly indicating limited admixture between these strains and those from  
182 the other collections.

183

#### 184 ***blpC/blpH* intragenomic pairing is highly biased but not exclusive**

185 Phylogenetic analysis of *blpC* revealed four well-supported clades (Fig. 2) containing the following signals: 1)  
186 Alpha, Bravo, and Kilo; 2) Golf and Hotel; 3) Charlie; and 4) Delta, Echo, and Foxtrot. With the exception of the Delta  
187 signal, within-group signals are differentiated by a single amino acid or stop codon. The relationships between signaling  
188 groups within these major clades are uncertain, although there is evidence ( $0.75 < \text{posterior probability} < 0.95$ ) that the  
189 Hotel, Bravo, and Delta signals are each monophyletic within their respective larger clades.

190 After accounting for recombination, phylogenetic analysis of the receptor domain of *blpH* (residues 1-229)  
191 identified five paraphyletic clades that are broadly concordant with the divisions observed for BlpC signals (Fig. 3),  
192 although there are many exceptions to this correspondence. Across the five clades, the classification of *blpH* alleles  
193 correlated with the BlpC signal in at least 75% of cases: (Alpha / Bravo / Kilo Clade: 86.6%; Echo / Foxtrot Clade:  
194 90.0%; Delta Clade: 100%; Charlie Clade: 86.2%; Golf / Hotel Clade: 75.0%). Evidence of extensive recombination  
195 affecting the *blpH* kinase, intergenic region, and *blpC* signal (Fig. S2) suggests that recombination has caused some of  
196 these mismatches. Overall, from the 4 002 genomes with full-length *blpH* genes, 16.7% (667 genomes) show a lack of  
197 correspondence between signal and peptide, suggesting either that these strains are deficient in *blp* signaling or that  
198 these BlpH histidine kinase receptors can be cross-induced by non-cognate BlpC signals. Overall frequencies by signal  
199 and receptor class are summarized in Fig. 4a.

200

#### 201 **Crosstalk and eavesdropping between BlpC signals and BlpH receptors**

202 To examine the incidence of crosstalk and eavesdropping between signals and receptors experimentally, we measured  
203 the responsiveness of each of the major BlpH clades to synthetic peptides from each BlpC class. We transformed a *S.*  
204 *pneumoniae* D39 strain lacking the native *blp* regulatory genes (*blpSRHC*) with constructs expressing one of six

205 different BlpH histidine kinases alleles: *blpSRH*<sup>D39</sup> from the Alpha/Bravo/Kilo clade, *blpSRH*<sup>PMEN-2</sup> from the  
206 Echo/Foxtrot clade, *blpSRH*<sup>Hermans-33</sup> from the Delta clade, *blpSRH*<sup>Hermans-1012</sup> and *blpSRH*<sup>PMEN-14</sup> from the Charlie clade,  
207 and *blpSRH*<sup>PMEN-18</sup> from the Golf/Hotel clade. These strains also contained a reporter cassette, in which the *blp*-  
208 promoter from either P<sub>blpK</sub> or P<sub>blpT</sub> controlled expression of firefly luciferase (*luc*), GFP (*(sf)gfp*), and β-galactosidase  
209 (*lacZ*) (Kjos et al. 2016). Deletion of the *blpC* signal gene and the native *blpSRH* genes from the D39 ancestor ensured  
210 that the reporter strains would only be induced in response to exogenously added signal via the introduced *blpSRH*  
211 systems. By exposing cells to a concentration gradient of exogenous peptide, we could estimate the peptide  
212 concentration that induced the maximum response as well the minimum concentration required to elicit a response.  
213 While the maximum response indicates the overall influence of a given peptide on each receptor, the minimal  
214 concentration required to induce a response provides an indication of the sensitivity of each receptor to every potential  
215 peptide partner.

216         Figures 4a-b shows that five of six P<sub>blpK</sub> reporter strains were maximally induced by the BlpC signal carried by a  
217 significant majority of their wild type counterparts. However, we also see extensive evidence for crosstalk and  
218 eavesdropping between mismatched peptide:receptor pairs, demonstrating that some BlpH receptors are highly  
219 promiscuous while equally, several BlpC peptides can induce the *blp* operon in strains carrying non-complementary  
220 BlpH receptors. For example, *blpSRH*<sup>PMEN-2</sup> (Echo / Foxtrot BlpH clade) could be induced by 4 out of 6 synthetic  
221 peptides, and the strain with *blpSRH*<sup>Hermans-1012</sup> (Charlie BlpH clade) was strongly induced by the Echo and Foxtrot  
222 signals at 65% and 71% expression of its cognate signal. While there is clear evidence for cross-induction, these  
223 responses tended to be less sensitive to non-cognate peptides, with a minimum concentration required for induction of  
224 between 2-500-fold greater than with the cognate signal (Fig. 4c). By contrast, the strain with *blpSRH*<sup>Hermans-1012</sup> (Charlie  
225 BlpH clade) was more sensitive to the non-cognate Echo and Foxtrot signals (1 ng/ml and 3.9 ng/ml) than to its  
226 complementary Charlie signal (7.8 ng/ml; Fig. 4c). The reporter strain carrying *blpSRH*<sup>Hermans-33</sup> did not respond to any  
227 of the BlpC peptides, not even its cognate Delta BlpC (Fig. 4b-c). Interestingly, *blpSRH*<sup>Hermans-33</sup>, as well as all other  
228 strains with *blpH* alleles in the Delta clade, contains a frameshift in the *blpR* gene, encoding the response regulator, thus  
229 preventing expression of the full-length *blpR*. This probably renders the QS systems non-functional and therefore not  
230 responsive to added peptide. All results with P<sub>blpK</sub> were mirrored with a different set of reporter strains that used the  
231 *blpT* promoter for the reporter cassette (Fig. S3).

232         We conclude from these results that crosstalk among quorum-dependent peptide BlpC signals is common and  
233 concentration dependent, with strains able to eavesdrop onto multiple signals using cross-responsive receptors.  
234 Furthermore, these results are concordant with the patterns of co-association observed in our bioinformatics survey of  
235 pneumococcal strains. When only considering genomes carrying *blpC* and *blpH* alleles potentially capable of *blp*  
236 activation (as determined in Fig. 4b and 4c), 88.0 % of the strains are predicted to autoinduce *blp* expression under



237 appropriate conditions, i.e., their genomes contain functionally active *blpC/blpH* pairs. Notably, however, this also  
238 indicates that a substantial proportion of strains (12.0%, 364 of 3 046 genomes) may not be able to autoinduce *blp*  
239 expression since they carry *blpC/blpH* pairs that were inactive in our experimental assay; this is in addition to strains  
240 carrying Delta *blpC/blpH*, which was also unable to autoinduce *blp* expression in our assay.

241

#### 242 **Cross-induction between colonies**

243 Pneumococci in the nasopharynx live in spatially structured colonies or biofilms. In order to determine if cross-  
244 induction between signaling cells could occur under these conditions where QS efficiency may be limited by signal  
245 diffusion (Redfield 2002; Kümmerli & Brown 2010; Yang et al. 2010), we examined interactions between neighboring  
246 colonies endogenously secreting either cognate or non-cognate signals (Fig. 5). In control assays, we first demonstrated  
247 that colonies were induced by exogenous addition of peptide to the plate surface; these results were concordant with  
248 those in Figure 4b in 14 of 15 combinations (Fig. S4). Next, we measured expression of reporter strains when grown  
249 adjacent to wild-type colonies that secreted BlpC peptides at endogenous levels (Fig. 5A). We observed a response in  
250 the reporter strains as estimated by increased LacZ activity in 3 out of 6 strains, with 2 examples of induction by non-  
251 cognate BlpC signals. Interestingly, when the reporter strain expressing the BlpH from Hermans-1012 was grown  
252 adjacent to its wild type counterpart, there was no induction; instead this strain was induced by PMEN-14, which also  
253 produced the Charlie signal. The same strain was also induced by PMEN-2, which produced the Foxtrot signal (which  
254 induces Hermans-1012 at a lower concentration than with its cognate signal; Fig. 4C), and strain PMEN-18 (Golf/Hotel  
255 BlpH clade) was induced by PMEN-14, which produced the Charlie signal (Fig. 5). This may suggest that in addition to  
256 differences in the binding affinities of BlpC and BlpH, strains may also vary in the concentration of the diffusible  
257 signals that they secrete, at least under these experimental conditions. Consistent with our *in vitro* assays with  
258 synthesized peptides, these results show that *blp* operon expression can be activated by crosstalk between neighboring  
259 competing colonies secreting peptides at wild-type concentrations.

260

#### 261 **Evolutionary consequences of eavesdropping genotypes**

262 Because the *blp* operon is auto-induced via a quorum-dependent process, cross-induction can potentially  
263 influence other strains by lowering the population density required for auto-induction. To examine the possible effects  
264 of cross-induction on bacteriocins, we developed a spatially explicit stochastic model to investigate conditions where  
265 genotypes with eavesdropping receptors may be favored over strains only able to respond to a single peptide signal. We  
266 further varied the signal affinity to eavesdropping receptors to determine how this altered the selective benefits of cross-  
267 induction. Simulations are initiated with cells of four genotypes randomly spaced upon a plane. The four genotypes  
268 each release their own QS signal at equal concentrations (Table S2). Cells bind these secreted signals in a concentration

269 dependent manner, at which point they are induced to produce bacteriocins that kill susceptible neighbor cells at the  
270 cost of reduced growth for the producer (Ruparell et al. 2016). While two faithful-signaling genotypes are only able to  
271 respond to their own signals, the two other eavesdropping genotypes can respond to multiple signals. Our results shown  
272 in Fig. 6 lead to two conclusions. First, we observe strong benefits to eavesdropping cells that depends on the degree of  
273 cross-sensitivity, or affinity, to non-cognate signals. Specifically, we found that higher affinity to non-cognate signal  
274 provides stronger ecological benefits. This results from earlier potential activation (Fig. S3) and secretion of  
275 bacteriocins in these cells, an effect that increases with greater affinity to non-cognate signals. Second, we find that the  
276 benefits to eavesdropping are strongly negative frequency-dependent, i.e. eavesdropping cells only gain benefits (in the  
277 form of earlier bacteriocin induction) when surrounded by faithful-signaling cells. When eavesdropping cells are rare,  
278 they benefit through maximum exposure to the alternative peptide, while after they increase in frequency they must rely  
279 solely on auto-induction. Because the benefits of eavesdropping are frequency-dependent, these simple simulations thus  
280 suggest that promiscuous receptor mutants with increased affinity to non-cognate signals will be able to rapidly invade  
281 populations of cells that can only respond to a single signal. Interestingly, the simulations also clarify that the affinity to  
282 non-cognate signals can be extremely low — even at 10% of the affinity to cognate signals — to provide benefits (Fig.  
283 6).

284

## 285 **Discussion**

286 Pneumococcal bacteriocins are believed to play an important role in mediating intraspecific competitive  
287 interactions (Dawid et al. 2007). Here, we show that the QS system regulating *blp* bacteriocins is highly polymorphic,  
288 that QS signals are frequently cross-reactive (crosstalk), and that promiscuous receptors can detect and respond to non-  
289 cognate signals (eavesdropping). Assays between adjacent colonies revealed that both behaviors occur at endogenous  
290 concentrations of secreted peptides, and simulations showed ecological benefits to strains that express promiscuous  
291 receptors. Together, these results suggest that social interactions influenced by QS signaling may strongly influence  
292 pneumococcal competition.

293 Previous surveys (De Saizieu et al. 2000; Reichmann & Hakenbeck 2000) of BlpC and BlpH identified four  
294 BlpC signals: the Alpha, Charlie, Foxtrot, and Golf signals in our nomenclature, which together represent ~75% of the  
295 strains in our sample (Table 1). By expanding our survey to thousands of strains, we identified several additional signal  
296 peptide families (Fig. 2): the Echo, Hotel, Delta, Bravo, and Kilo signals. The concordance between the phylogenies of  
297 *blpC* and *blpH* and the extensive co-occurrence in individual genomes suggest that these genes are co-evolving (Fig. 2,  
298 Fig. 3).

299 While the correlation between *blpH* clade and co-occurring BlpC signal is high, in some clades the correlation  
300 drops to 75.0%, and BlpH / BlpC mismatches (Fig. 3) are common across the pneumococcal phylogeny. This can be

301 compared to the exceptionally tight, > 99% correlation between the ComD QS receptor and CSP signal also in *S.*  
302 *pneumoniae* (Miller et al. 2017). There are at least two explanations for this difference. First, we do not know if  
303 different BlpH variants are functionally distinct. All *blpH* alleles could, in principle, be most responsive to their co-  
304 occurring BlpC. This seems unlikely, given the high frequency (up to 45 signal:receptor pairs) of *blpH* clade / BlpC  
305 mismatches (Fig. 3). Second, weaker selection for a highly auto-inducing *blp* QS could explain the difference between  
306 the *blp* and *com* QS systems. After a recombination event that results in a sub-optimal BlpH/ BlpC pair for auto-  
307 induction, the BlpC signal may still be able to activate the co-occurring BlpH variant through crosstalk, albeit at a  
308 higher concentration of BlpC (Fig. 4C). While auto-induction may be decreased, such a genotype would gain an  
309 eavesdropping receptor that can potentially detect signals of surrounding genotypes. For comparison, there is no  
310 eavesdropping between CSP phenotypes in the *com* QS system, and very rare signal/receptor mismatches (Iannelli et al.  
311 2005; Miller et al. 2017).

312 Signal/receptor mismatches can result in two outcomes for cell:cell communication. First, cells may be unable to  
313 detect the signal that they produce, rendering them unable to auto-induce. The lack of QS activation in strains producing  
314 the Delta signal (Hermans-33; Fig. 4) seemingly fits this description; however, interestingly, this is not caused by signal  
315 / receptor mismatch because there is perfect concordance between the Delta signal and the Delta *blpH* clade, and no  
316 tested signal activated strains with Delta *blpH*. Instead, all 143 strains carrying the Delta signal have a frameshift in  
317 *blpR*, which suggests functional deterioration of the QS system in these strains, which has not yet led to deterioration of  
318 *blpH* and *blpC*. These Delta BlpC strains are not simply ‘cheater’ cells, as they potentially continue to pay the cost of  
319 synthesizing BlpC if the *blpC* gene is actively transcribed. This suggests there may be weakened selection for functional  
320 *blp* QS.

321 The second outcome of signal/receptor mismatches for cell-to-cell communication is crosstalk and  
322 eavesdropping. We have ample evidence for crosstalk in the *blp* QS system, as all signal peptides except for the Alpha  
323 signal activated QS receptors in genotypes that produce other QS signals (Fig. 4b-c). Similarly, BlpH receptors (aside  
324 from the Alpha clade) were eavesdropping QS receptors able to detect more than one QS peptide signal (Fig. 4b, Fig.  
325 4c). Each of the receptors we tested (except for the signal-blind BlpH Delta clade) was maximally induced with a single  
326 set of related signals and decreased to 3-71% with signals that the receptors were eavesdropping upon (Fig 4b). This  
327 suggests that there are no ‘generalist’ receptors that are able to listen to multiple signals with equal affinity. Crosstalk  
328 was observed in previous research on the *blp* system (Pinchas et al. 2015; see asterisks in Fig. 4c and Table 1 alternative  
329 signal names), and results from this study indicated that *blpH* alleles with more crosstalk were less sensitive to BlpC  
330 (Pinchas et al. 2015). However, the results reported here show that receptors from strains PMEN-2, Hermans-1012, and  
331 PMEN-14 were all highly sensitive to their complementary signal ( $\leq 1.0$  ng/ml) despite showing extensive crosstalk

332 (Fig. 4c), thereby suggesting that the trade-off between crosstalk and sensitivity of *blpH* alleles is not a general  
333 phenomenon.

334 What are the potential consequences of crosstalk and eavesdropping? Crosstalk may enable one strain to  
335 manipulate competing strains into inducing their QS system at lower densities, thereby causing them to secrete  
336 bacteriocins and induced immunity proteins earlier. At present, it is unclear how such crosstalk would be beneficial to  
337 cells producing cross-reactive signals, unless premature production of bacteriocins or immunity introduces energetic or  
338 other costs to cells responding at sub-quorum densities. Similar benefits are thought to exist for other bacterial public  
339 goods (West et al. 2012; Diggle et al. 2007). By contrast, it is easier to envision the potential benefits of eavesdropping,  
340 which can both lead to earlier activation of bacteriocins (although this may also have attendant costs) and earlier  
341 induction of cross-reactive immunity. Our simulations suggest that this could be beneficial even if the affinity of  
342 promiscuous receptors is only 10% of the affinity for their cognate signal (Fig. 6). This value falls within the range of  
343 responses we measured experimentally (Fig. 4c). This level of responsiveness is also sufficient to induce the *blp* operon  
344 among adjacent colonies secreting peptides at endogenous levels (Fig. 5).

345 How does this amount of crosstalk specifically affect bacteriocin-mediated competition between *S. pneumoniae*  
346 strains? This is challenging to answer conclusively. First, extensive variation in the kinase domain of BlpH, the  
347 response regulator BlpR, and the leader sequences of the *blp* bacteriocins (Miller et al. 2016) prevents a full  
348 understanding of how signal concentrations translate into increased bacteriocin export. A systematic approach to  
349 investigate each of these molecules and their variants in the laboratory will be required to address this question. Second,  
350 a bioinformatics approach to examine evidence of selection in coordination with the BlpH receptor or BlpC signal is not  
351 possible due to the inability to align the entire *blp* operon and because recombination breaks up potential associations  
352 that are otherwise selected for. Third, the effects of crosstalk and eavesdropping will also depend on the activation of  
353 the *com* QS system, which promotes the expression and export of *blpC* at a low level (Fig. 1), even when the ABC-  
354 transporter genes *blpAB* are disrupted by early termination mutations (Kjos et al. 2016; Wei-Yun et al. 2016). For  
355 example, we found that both wildtype strains D39 and PMEN-14 could activate *blp* expression in neighboring colonies  
356 (Fig. 5) despite having disrupted *blpA* (for PMEN-14) or disrupted *blpA* and *blpB* (for D39).

357 Signaling interactions *in vitro* can lead to complex ecological outcomes that may influence competitive  
358 interactions between strains. As yet, however, it is unclear how these interactions will play out in the complex within-  
359 host environment of the human nasopharynx (Valente et al. 2016). In addition, it remains unclear how these interactions  
360 directly influence bacteriocin-mediated killing and immunity. Clearly, the heterogeneous conditions *in vivo* differ  
361 markedly between liquid cultures or agar surfaces. Diffusion is more limited, while population densities may be  
362 strongly constrained overall and spatially. These factors, among others, may alter the level and dispersion of signal  
363 peptides as well as the sensitivity of individual strains to these signals. More generally, our results reinforce the

364 importance of social interactions among bacteria for mediating competitive dynamics. Many ecologically relevant  
365 bacterial traits are regulated by QS, and many of these systems, especially in Gram-positive peptide signaling systems,  
366 are polymorphic. While some of these systems (e.g. pneumococcal competence regulated by the *com* QS system) have  
367 only few signal types and show no cross-reactivity, many others signal are polymorphic with substantial cross-reactivity  
368 (e.g. Agr in *S. aureus* (Ji et al. 1997) and ComX in *B. subtilis* (Stefanic et al. 2012)). It remains to be investigated which  
369 of these polymorphic QS signals have ecological effects and which factors (such as co-colonization or extensive  
370 intraspecific competition) result in the evolution of crosstalk and eavesdropping.

371

### 372 **Acknowledgements**

373 We would like to thank Frank Lake for technical assistance. This work was supported by the Biotechnology and  
374 Biological Sciences Research Council (grant number BB/J006009/1) to DER and ISR and by the Wellcome Trust  
375 (105610/Z/14/Z) to the University of Manchester. MA is supported by the Biotechnology and Biological Sciences  
376 Research Council (grant number BB/M000281/1). Work in the Veening lab is supported by the EMBO Young  
377 Investigator Program, a VIDI fellowship (864.12.001) from the Netherlands Organisation for Scientific Research, Earth  
378 and Life Sciences (NWO-ALW) and ERC starting grant 337399-PneumoCell. MK is supported by a grant from The  
379 Research Council of Norway (250976/F20).

380

### 381 **Conflict of Interest**

382 The authors declare no conflict of interest.

383

### 384 **References**

- 385 Ansaldi, M. & Dubnau, D., 2004. Diversifying selection at the Bacillus quorum-sensing locus and determinants of  
386 modification specificity during synthesis of the ComX pheromone. *Journal of Bacteriology*, 186(1), pp.15–21.
- 387 Atkinson, S. & Williams, P., 2009. Quorum sensing and social networking in the microbial world. *Journal of the Royal*  
388 *Society, Interface / the Royal Society*, 6(40), pp.959–78.
- 389 Bassler, B.L., Greenberg, E.P. & Stevens, A.M., 1997. Cross-species induction of luminescence in the quorum-sensing  
390 bacterium *Vibrio harveyi*. *Journal of Bacteriology*, 179(12), pp.4043–4045.
- 391 Bogaert, D., Engelen, M.N., Timmers-Reker, A.J., Elzenaar, K.P., Peerbooms, P.G., Coutinho, R.A., et al., 2001.  
392 Pneumococcal carriage in children in the Netherlands: A molecular epidemiological study. *Journal of Clinical*  
393 *Microbiology*, 39(9), pp.3316–3320.
- 394 Bouillaut, L., Perchat, S., Arold, S., Zorrilla, S., Slamti, L., Henry, C., et al., 2008. Molecular basis for group-specific  
395 activation of the virulence regulator PlcR by PapR heptapeptides. *Nucleic Acids Research*, 36(11), pp.3791–3801.
- 396 Brugger, S.D., Frey, P., Aebi, S., Hinds, J. & Mühlemann, K., 2010. Multiple colonization with *S. pneumoniae* before  
397 and after introduction of the seven-valent conjugated pneumococcal polysaccharide vaccine. *PLoS One*, 5(7),  
398 p.e11638.
- 399 Chancey, S.T., Agrawal, S., Schroeder, M.R., Farley, M.M., Tettelin, H. and Stephens, D.S., 2015. Composite mobile  
400 genetic elements disseminating macrolide resistance in *Streptococcus pneumoniae*. *Frontiers in microbiology*, 6.  
401 Chewapreecha, C., Harris, S.R., Croucher, N.J., Turner, C., Marttinen, P., Cheng, L., et al., 2014. Dense genomic  
402 sampling identifies highways of pneumococcal recombination. *Nature Genetics*, 46(3), pp.305-309.
- 403 Crespi, B., 2001. The evolution of social behavior in microorganisms. *Trends in ecology & evolution*, 16(4), pp.178-  
404 183.

- 405 Croucher, N.J., Mitchell, A.M., Gould, K.A., Inverarity, D., Barquist, L., Feltwell, T., et al., 2013. Dominant role of  
406 nucleotide substitution in the diversification of serotype 3 pneumococci over decades and during a single infection.  
407 *PLoS Genetics*, 9(10).
- 408 Croucher, N.J., Finkelstein, J.A., Pelton, S.I., Mitchell, P.K., Lee, G.M., Parkhill, J., et al., 2013. Population genomics  
409 of post-vaccine changes in pneumococcal epidemiology. *Nature Genetics*, 45(6), pp.656–63.
- 410 Croucher, N.J., Harris, S.R., Fraser, C., Quail, M.A., Burton, J., van der Linden, M., et al., 2011. Rapid pneumococcal  
411 evolution in response to clinical interventions. *Science*, 331(6016), pp.430–434.
- 412 Dawid, S., Roche, A.M. & Weiser, J.N., 2007. The *blp* bacteriocins of *Streptococcus pneumoniae* mediate intraspecies  
413 competition both *in vitro* and *in vivo*. *Infection and Immunity*, 75(1), pp.443–451.
- 414 Diggle, S.P., Griffin, A.S., Campbell, G.S. and West, S.A., 2007. Cooperation and conflict in quorum-sensing bacterial  
415 populations. *Nature*, 450(7168), pp.411–414.
- 416 Eldar, A., 2011. Social conflict drives the evolutionary divergence of quorum sensing. *Proceedings of the National  
417 Academy of Sciences*, 108(33), pp.13635–13640.
- 418 García-Rodríguez, J.A. & Fresnadillo Martínez, M.J., 2002. Dynamics of nasopharyngeal colonization by potential  
419 respiratory pathogens. *The Journal of antimicrobial chemotherapy*, 50 Suppl S, pp.59–73.
- 420 Håvarstein, L.S., Diep, D.B. & Nes, I.F., 1995. A family of bacteriocin ABC transporters carry out proteolytic  
421 processing of their substrates concomitant with export. *Molecular Microbiology*, 16(2), pp.229–240.
- 422 Iannelli, F., Oggioni, M.R. & Pozzi, G., 2005. Sensor domain of histidine kinase ComD confers competence phenotype  
423 specificity in *Streptococcus pneumoniae*. *FEMS Microbiology Letters*, 252(2), pp.321–326.
- 424 Ji, G., Beavis, R. & Novick, R.P., 1997. Bacterial interference caused by autoinducing peptide variants. *Science*,  
425 276(5321), pp.2027–2030.
- 426 Jiricny, N., Diggle, S.P., West, S.A., Evans, B.A., Ballantyne, G., Ross-Gillespie, A., et al., 2010. Fitness correlates  
427 with the extent of cheating in a bacterium. *Journal of Evolutionary Biology*, 23(4), pp.738–747.
- 428 Kjos, M., Miller, E., Slager, J., Lake, F.B., Gericke, O., Roberts, I.S., et al., 2016. Expression of *Streptococcus  
429 pneumoniae* bacteriocins is induced by antibiotics via regulatory interplay with the competence system. *PLOS  
430 Pathogens*, 12(2), p.e1005422.
- 431 Kümmerli, R. & Brown, S.P., 2010. Molecular and regulatory properties of a public good shape the evolution of  
432 cooperation. *Proceedings of the National Academy of Sciences of the United States of America*, 107(44), pp.18921–  
433 18926.
- 434 Lux, T., Nuhn, M., Hakenbeck, R. and Reichmann, P., 2007. Diversity of bacteriocins and activity spectrum in  
435 *Streptococcus pneumoniae*. *Journal of Bacteriology*, 189(21), pp.7741–7751.
- 436 McGee, L., McDougal, L., Zhou, J., Spratt, B.G., Tenover, F.C., George, R., et al., 2001. Nomenclature of major  
437 antimicrobial-resistant clones of *Streptococcus pneumoniae* defined by the pneumococcal molecular epidemiology  
438 network. *Journal of Clinical Microbiology*, 39(7), pp.2565–2571.
- 439 Meats, E., Brueggemann, A.B., Enright, M.C., Sleeman, K., Griffiths, D.T., Crook, D.W., et al., 2003. Stability of  
440 serotypes during nasopharyngeal carriage of *Streptococcus pneumoniae*. *Journal of Clinical Microbiology*, 41(1),  
441 pp.386–392.
- 442 Miller, E.L., Abrudan, M.I., Roberts, I.S. and Rozen, D.E., 2016. Diverse ecological strategies are encoded by  
443 *Streptococcus pneumoniae* bacteriocin-like peptides. *Genome Biology and Evolution*, 8(4), pp.1072–1090.
- 444 Miller, E.L., Evans, B.A., Cornejo, O.E., Roberts, I.S. and Rozen, D.E., 2017. Pherotype polymorphism in  
445 *Streptococcus pneumoniae* has no obvious effects on population structure and recombination. *Genome Biology and  
446 Evolution*, 9(10), pp.2546-2559.
- 447 Miller, M.B. & Bassler, B.L., 2001. Quorum sensing in bacteria. *Annual Review of Microbiology*, 55, pp.165–199.
- 448 Moreno-Gamez, S., Sorg, R., Domenech, A., Kjos, M., Weissing, F.J., van Doorn, G.S., et al., 2016. Quorum sensing  
449 integrates environmental cues, cell density and cell history to control bacterial competence. *bioRxiv*, 31(0),  
450 p.75762. Available at: <http://biorxiv.org/lookup/doi/10.1101/075762>.
- 451 Pinchas, M.D., LaCross, N.C. & Dawid, S., 2015. An electrostatic interaction between BlpC and BlpH dictates  
452 pheromone specificity in the control of bacteriocin production and immunity in *Streptococcus pneumoniae*. *Journal  
453 of Bacteriology*, 197(7), pp.1236–1248.
- 454 Pollak, S., Omer-Bendori, S., Even-Tov, E., Lipsman, V., Bareia, T., Ben-Zion, I., et al., 2016. Facultative cheating  
455 supports the coexistence of diverse quorum-sensing alleles. *Proceedings of the National Academy of Sciences*,  
456 113(8), pp.2152–2157.
- 457 Redfield, R.J., 2002. Is quorum sensing a side effect of diffusion sensing? *Trends in Microbiology*, 10(8), pp.365–370.
- 458 Regev-Yochay, G., Raz, M., Dagan, R., Porat, N., Shainberg, B., Pinco, E., et al., 2004. Nasopharyngeal carriage of  
459 *Streptococcus pneumoniae* by adults and children in community and family settings. *Clinical Infectious  
460 Diseases*, 38(5), pp.632–639.
- 461 Reichmann, P. & Hakenbeck, R., 2000. Allelic variation in a peptide-inducible two-component system of *Streptococcus  
462 pneumoniae*. *FEMS microbiology letters*, 190(2), pp.231–236.
- 463 Ruparell, A. et al., 2016. The fitness burden imposed by synthesizing quorum sensing signals. *Scientific Reports*,  
464 6(August), p.33101.
- 465 De Saizieu, A., Gardès, C., Flint, N., Wagner, C., Kamber, M., Mitchell, T.J., et al., 2000. Microarray-based  
466 identification of a novel *Streptococcus pneumoniae* regulon controlled by an autoinduced peptide. *Journal of  
467 Bacteriology*, 182(17), pp.4696–4703.

- 468 St Sauver, J., Marrs, C.F., Foxman, B., Somsel, P., Madera, R. and Gilsdorf, J.R., 2000. Risk factors for otitis media  
469 and carriage of multiple strains of *Haemophilus influenzae* and *Streptococcus pneumoniae*. *Emerging infectious*  
470 *diseases*, 6(6), p.622.
- 471 Schluter, J., Schoech, A.P., Foster, K.R. and Mitri, S., 2016. The evolution of quorum sensing as a mechanism to infer  
472 kinship. *PLoS computational biology*, 12(4), p.e1004848.
- 473 Slager, J., Kjos, M., Attaiech, L. and Veening, J.W., 2014. Antibiotic-induced replication stress triggers bacterial  
474 competence by increasing gene dosage near the origin. *Cell*, 157(2), pp.395-406.
- 475 Son, M.R., Shchepetov, M., Adrian, P.V., Madhi, S.A., de Gouveia, L., von Gottberg, A., et al., 2011. Conserved  
476 mutations in the pneumococcal bacteriocin transporter gene, *blpA*, result in a complex population consisting of  
477 producers and cheaters. *mBio*, 2(5).
- 478 Stefanic, P., Decorosi, F., Viti, C., Petito, J., Cohan, F.M. and Mandic-Mulec, I., 2012. The quorum sensing diversity  
479 within and between ecotypes of *Bacillus subtilis*. *Environmental microbiology*, 14(6), pp.1378-1389.
- 480 Strassmann, J.E. & Queller, D.C., 2011. Evolution of cooperation and control of cheating in a social microbe.  
481 *Proceedings of the National Academy of Sciences*, 108(Supplement\_2), pp.10855–10862.
- 482 Swem, L.R., Swem, D.L., Wingreen, N.S. and Bassler, B.L., 2008. Deducing receptor signaling parameters from in  
483 vivo analysis: LuxN/AI-1 quorum sensing in *Vibrio harveyi*. *Cell*, 134(3), pp.461-473.
- 484 Turner, P., Turner, C., Jankhot, A., Helen, N., Lee, S.J., Day, N.P., et al., 2012. A longitudinal study of *Streptococcus*  
485 *pneumoniae* carriage in a cohort of infants and their mothers on the Thailand-Myanmar border. *PLoS ONE*, 7(5).
- 486 Valente, C., Dawid, S., Pinto, F.R., Hinds, J., Simões, A.S., Gould, K.A., et al., 2016. The *blp* locus of *Streptococcus*  
487 *pneumoniae* plays a limited role in the selection of strains that can cocolonize the human nasopharynx. *Applied and*  
488 *Environmental Microbiology*, 82(17), pp.5206–5215.
- 489 Waters, C.M. & Bassler, B.L., 2005. Quorum Sensing: Cell-to-cell communication in bacteria. *Annual Review of Cell*  
490 *and Developmental Biology*, 21(1), pp.319–346.
- 491 Wholey, W.Y., Kochan, T.J., Storck, D.N. and Dawid, S., 2016. Coordinated bacteriocin expression and competence in  
492 *Streptococcus pneumoniae* contributes to genetic adaptation through neighbor predation. *PLoS pathogens*, 12(2),  
493 p.e1005413.
- 494 West, S.A., Winzer, K., Gardner, A. and Diggle, S.P., 2012. Quorum sensing and the confusion about diffusion. *Trends*  
495 *in Microbiology*, 20(12), pp.586-594.
- 496 West, S.A., Griffin, A.S., Gardner, A. and Diggle, S.P., 2006. Social evolution theory for microorganisms. *Nature*  
497 *Reviews Microbiology*, 4(8), pp.597-607.
- 498 Wyllie, A.L., Chu, M.L.J., Schellens, M.H., van Engelsdorp Gastelaars, J., Jansen, M.D., et al., 2014. *Streptococcus*  
499 *pneumoniae* in saliva of Dutch primary school children. *PLoS ONE*, 9(7), pp.1–8.
- 500 Yang, J., Evans, B.A. & Rozen, D.E., 2010. Signal diffusion and the mitigation of social exploitation in pneumococcal  
501 competence signalling. *Proceedings. Biological sciences / The Royal Society*, 277(1696), pp.2991–2999.
- 502
- 503

504 **Figure Legends**

505 **Figure 1.** QS eavesdropping, crosstalk, and regulation. A) Eavesdropping occurs when a QS receptor of a cell is  
506 activated by a QS signal that the cell does not produce, such as activation of the blue QS receptor by both the cognate  
507 blue square signal and non-cognate green triangle signal. Crosstalk occurs when a QS signal activates more than one  
508 receptor, such as the green triangle signal activating both the cognate green QS receptor and the non-cognate blue QS  
509 receptor. B) *blp* QS regulation. External BlpC signal binds to histidine kinase receptor BlpH. This activates response  
510 regulator BlpR through phosphorylation, which increases transcription of *blpABC*, *blpT*, the *blp* bacteriocins (including  
511 *blpK*), and immunity genes. Pre-BlpC is processed and transported out of the cell by ABC transporters ComAB and  
512 BlpAB. Similarly, QS signal CSP binds to histidine kinase receptor ComD, thereby phosphorylating response regulator  
513 ComE, which increases transcription of the *blp* operon (although to a lower amount than BlpR) as well as *com*-specific  
514 genes.

515

516 **Figure 2.** Bayesian unrooted phylogenetic tree of *blpC*. Taxa are colored by mature BlpC signal with the signal  
517 designation followed by the number of genomes containing the allele. Internal nodes show the posterior probabilities of  
518 clades; we collapsed clades with less than 0.75 posterior probability.

519

520 **Figure 3.** Bayesian unrooted phylogenetic tree of *blpH* alleles. The outer ring shows the number of 4 096 genomes with  
521 each *blpH* allele, color-coded by their co-occurring BlpC signal and on a log scale. The inner ring denotes the *blpH*  
522 clade type, and recombination events within *blpH* are shown as solid green lines. Mismatches between *blpH* clade and  
523 BlpC signal are indicated by dashed lines. Internal nodes show the posterior probabilities of clades; we collapsed clades  
524 with less than 90.0% posterior probability.

525

526 **Figure 4.** A) Proportion of each BlpC signal within genomes containing each *blpH* clade. The phylograms are  
527 simplified versions of Fig. 1 and Fig. 2. B) The relative maximal expression levels of *luc* following addition of 1  $\mu\text{g/ml}$   
528 of synthesized BlpC signal peptide. The maximum expression level for each reporter strain was set to 1. Raw data is  
529 found in Fig. S5 C) The minimum concentration of synthesized BlpC signal peptide required for *luc* induction in  
530 reporter strains with different BlpH. Asterisks indicate receptor/signal pair *blp* activation reported in (Pinchas et al.  
531 2015). Example of raw data is provided in Fig. S6. The Bravo, Kilo, and Hotel signal peptides were not synthesized and  
532 are denoted with slashes.

533



534 **Figure 5.** LacZ induction by neighboring colonies on agar plates. A) The wild-type strains were spotted next to the  
535 reporter strains (see box), and induction of *blp* expression by the wild-type produced BlpC is shown as faint blue  
536 colonies. The experiment was repeated three times with the same result, and a representative photo of the plates is  
537 shown. B) Summary of the results from B. Squares in white indicate no induction of the reporter strain for colony pairs,  
538 while black and blue indicate induction by complementary and on-complementary BlpCs, respectively.  
539

540 **Figure 6.** Average fitness of eavesdropping genotypes that produce bacteriocins in response to multiple signals in a  
541 spatially explicit, stochastic model. Simulations were started with five proportions of eavesdropping genotypes mixed  
542 with signal-faithful genotypes, as indicated on the x-axis. Absolute fitness values on the y-axis above 1.0 indicate that  
543 the genotype can increase in frequency in the population. Affinity to other genotypes' signals are a percentage of  
544 affinity to a genotype's own signal for eavesdropping genotypes. Error bars link the 25% and 75% quantiles for the  
545 final eavesdropping genotypes' fitness across 100 simulations.

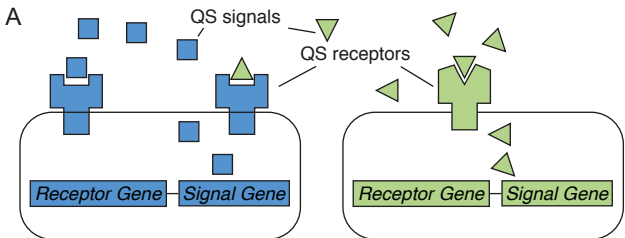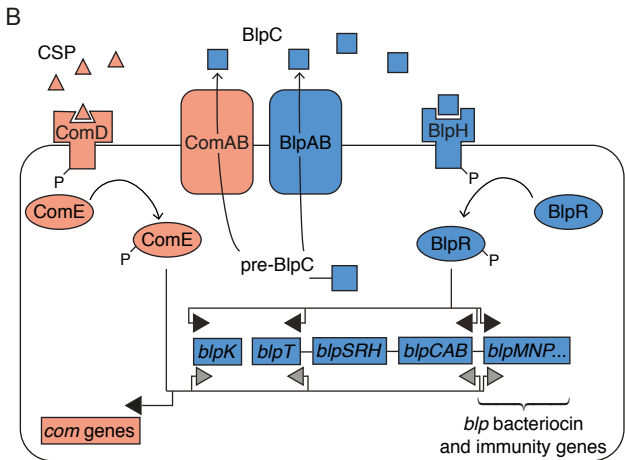

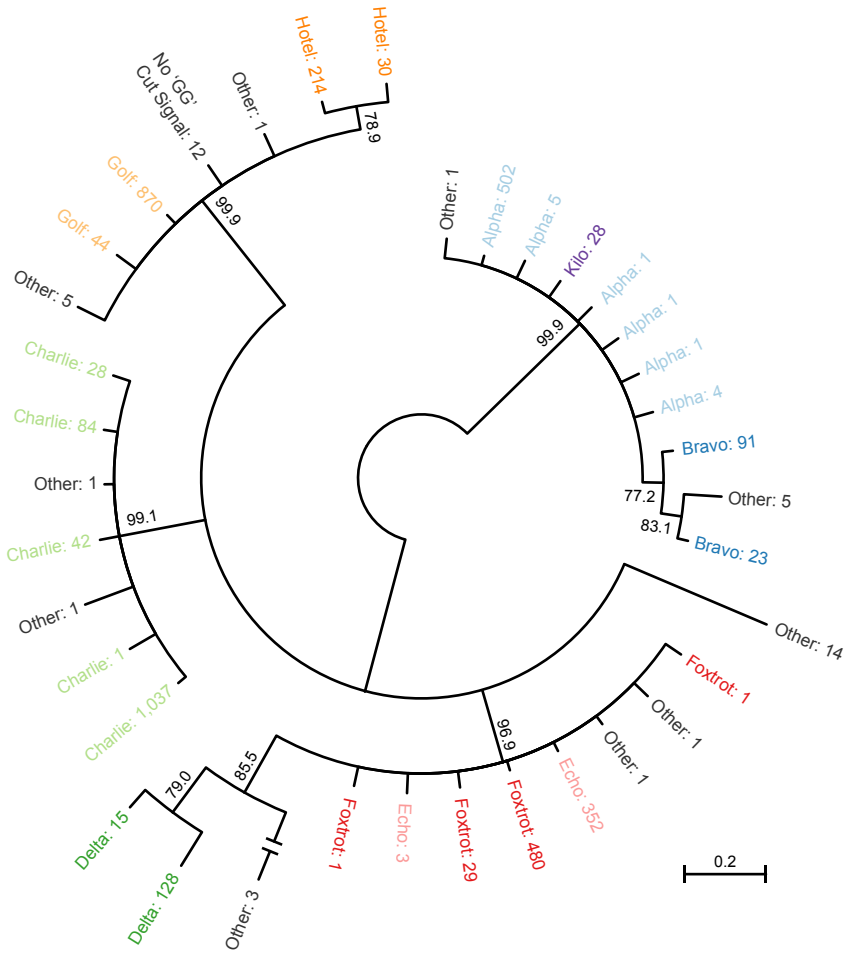

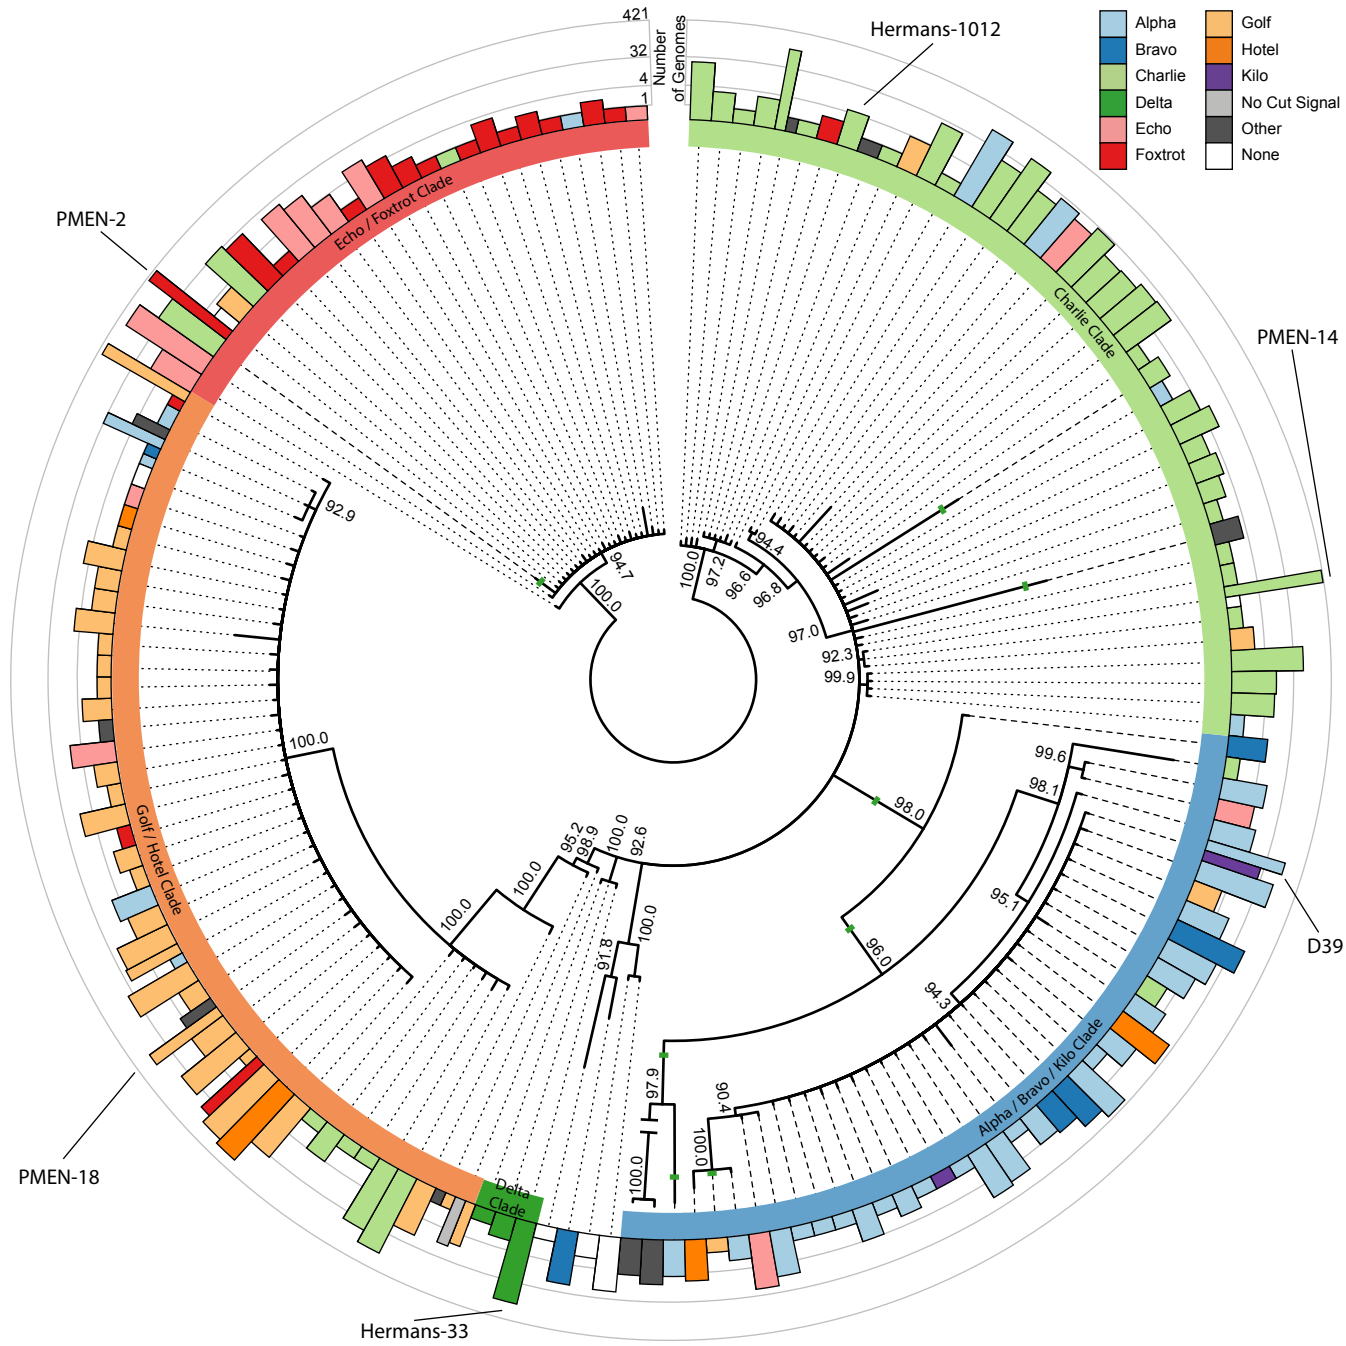

A

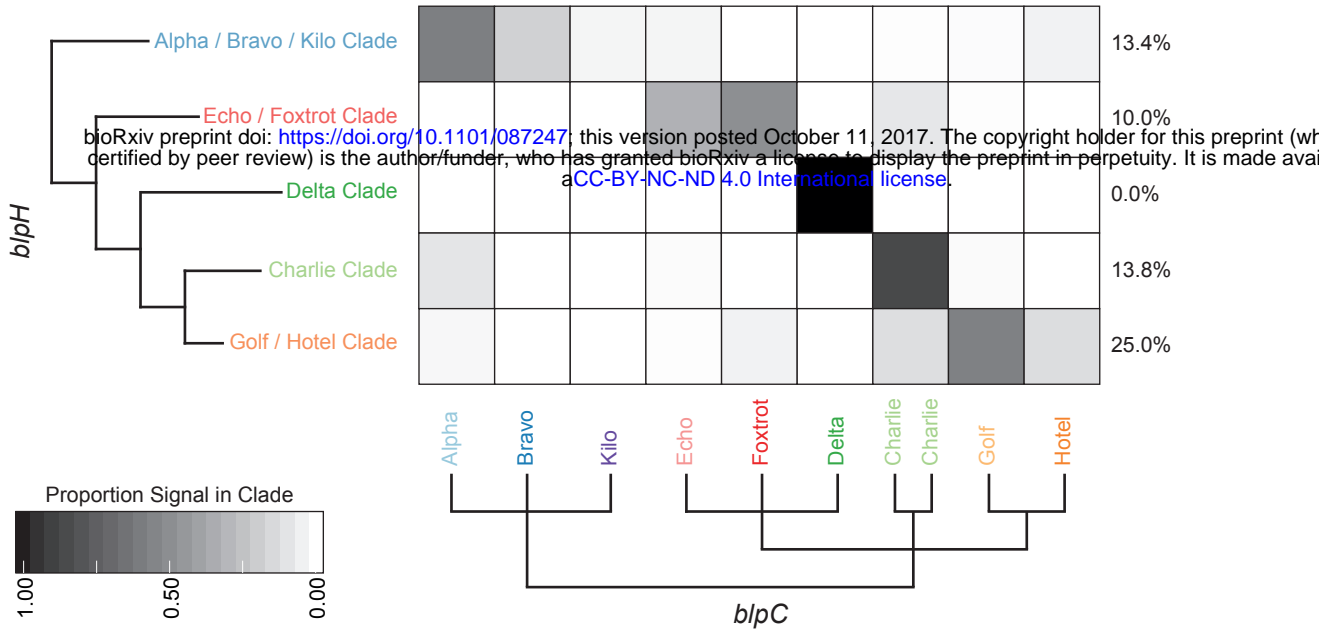

B

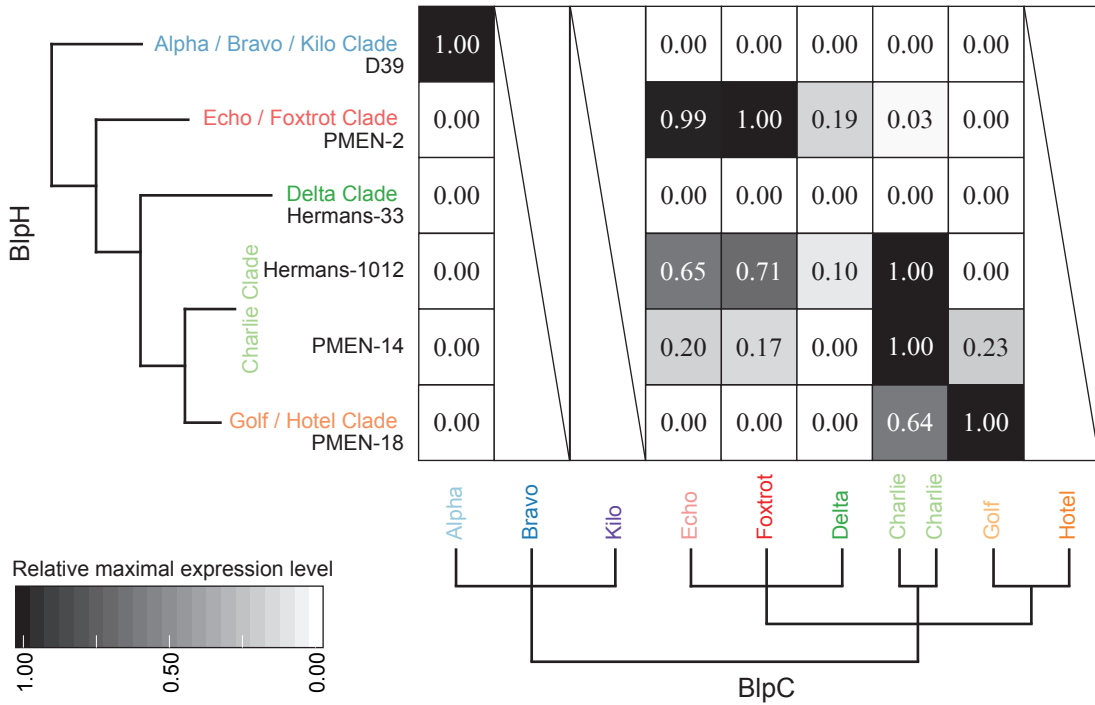

C

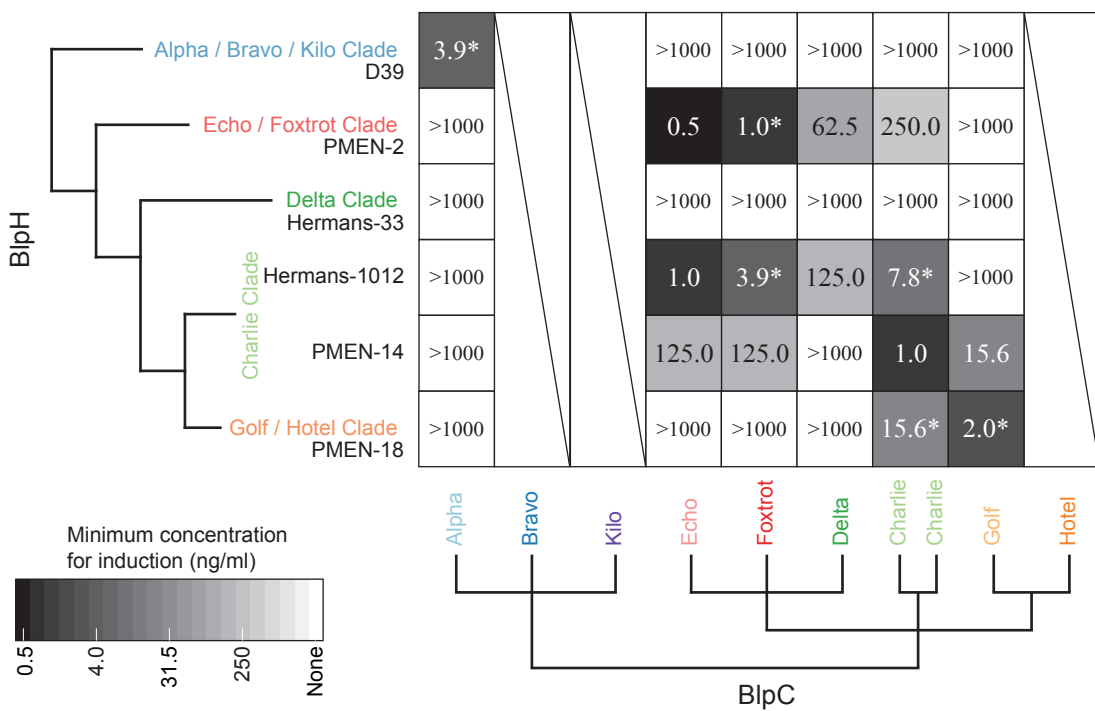



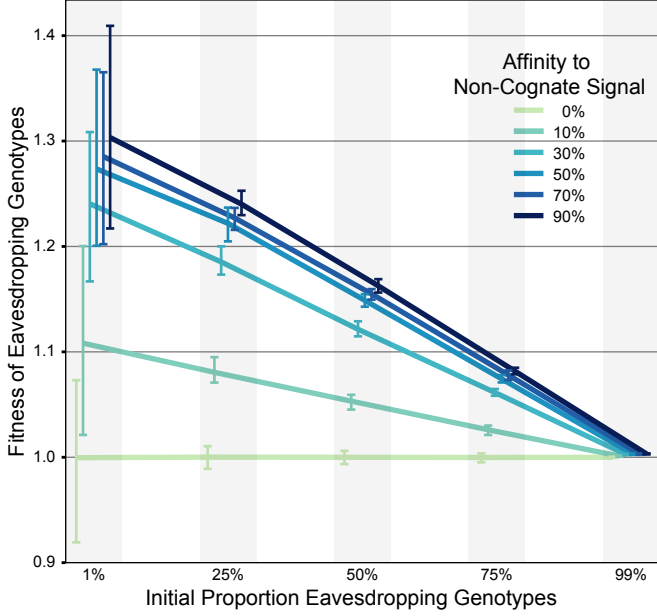

Source: https://www.biorxiv.org/content/10.1101/087247v3.full.pdf
